# Supplementary material for: Genomic Characteristics and Comparative Genomics Analysis of Two Chinese Corynespora cassiicola Strains Causing Corynespora Leaf Fall (CLF) Disease
Source: MDPI journal article supplement (doi:10.3390/jof7060485), 2021-06-16
Supplement: s1 [file s1]

Table Strains and gene information

| Strain  | Host                      | Geographical origin | Cassicolin isoform | GeneBank |
|---------|---------------------------|---------------------|--------------------|----------|
| YN49    | <i>Hevea brasiliensis</i> | China               | Cas5               | MW436470 |
| Ce01    | <i>Hevea brasiliensis</i> | China               | Cas2               | MW436471 |
| CCAM2   | <i>Hevea brasiliensis</i> | Cameroon            | Cas1               | JF915149 |
| CGHA1   | <i>Hevea brasiliensis</i> | Ghana               | Cas1               | JF915152 |
| GSO2    | <i>Vernonia cinerea</i>   | Brazil              | Cas2               | JF915166 |
| HGD01   | <i>Hevea brasiliensis</i> | China               | Cas2               | KU561095 |
| ATI13   | <i>Glycine max</i>        | Brazil              | Cas2               | JF915168 |
| JMP2020 | <i>Lantana camara</i>     | Brazil              | Cas2               | JF915167 |
| IA      | <i>Cucumis sativus</i>    | Brazil              | Cas2               | JF915163 |
| CMENY   | <i>Cucumis sativus</i>    | Brazil              | Cas2               | JF915161 |
| CBS     | <i>Cucumis sativus</i>    | Brazil              | Cas2               | JF915160 |
| ATI17   | <i>Gossypium hirsutum</i> | Brazil              | Cas2               | JF915159 |
| 777AA   | <i>Glycine max</i>        | Brazil              | Cas2               | JF915157 |
| 493AA   | <i>Glycine max</i>        | Brazil              | Cas2               | JF915156 |
| ATI11   | <i>Cucumis sativus</i>    | Brazil              | Cas2               | JF915158 |
| EDIG    | <i>Cucumis sativus</i>    | Brazil              | Cas2               | JF915162 |
| PB      | <i>Cucumis sativus</i>    | Brazil              | Cas2               | JF915165 |
| RUD     | <i>Glycine max</i>        | Brazil              | Cas2               | JF915164 |
| E70     | <i>Hevea brasiliensis</i> | Brazil              | Cas3               | JF915169 |
| E78     | <i>Hevea brasiliensis</i> | Brazil              | Cas3               | JF915170 |
| E79     | <i>Hevea brasiliensis</i> | Brazil              | Cas4               | JF915171 |
| E139    | <i>Hevea brasiliensis</i> | Brazil              | Cas4               | JF915172 |
| HHN10   | <i>Hevea brasiliensis</i> | China               | Cas5               | KU561094 |
| CSB05A  | <i>Hevea brasiliensis</i> | Malaysia            | Cas5               | KM873321 |
| CSB16   | <i>Hevea brasiliensis</i> | Malaysia            | Cas5               | KM873324 |
| CSB5    | <i>Hevea brasiliensis</i> | Malaysia            | Cas5               | JF915177 |
| C68-6   | <i>Hevea brasiliensis</i> | Malaysia            | Cas5               | KM873315 |
| CSB05B  | <i>Hevea brasiliensis</i> | Malaysia            | Cas5               | KM873322 |
| CSB1    | <i>Hevea brasiliensis</i> | Malaysia            | Cas5               | JF915175 |
| CSB11   | <i>Hevea brasiliensis</i> | Malaysia            | Cas5               | KM873323 |
| CSB3    | <i>Hevea brasiliensis</i> | Malaysia            | Cas5               | KM873325 |
| CSB4    | <i>Hevea brasiliensis</i> | Malaysia            | Cas5               | JF915176 |
| CSB6    | <i>Hevea brasiliensis</i> | Malaysia            | Cas5               | JF915178 |
| CKT05F  | <i>Hevea brasiliensis</i> | Malaysia            | Cas5               | KM873319 |
| CSR12   | <i>Hevea brasiliensis</i> | Sri Lanka           | Cas5               | JF915180 |
| CKT05C  | <i>Hevea brasiliensis</i> | Malaysia            | Cas5               | KM873317 |
| C68-8   | <i>Hevea brasiliensis</i> | Malaysia            | Cas5               | KM873316 |
| CKT1    | <i>Hevea brasiliensis</i> | Malaysia            | Cas5               | KM873320 |
| CSB16R1 | <i>Hevea brasiliensis</i> | Malaysia            | Cas5               | JF915179 |
| SS1     | <i>Hevea brasiliensis</i> | Malaysia            | Cas5               | JF915173 |
| ATI13   | <i>Glycine max</i>        | Brazil              | Cas6               | JF915181 |
| RUD     | <i>Glycine max</i>        | Brazil              | Cas6               | JF915183 |

>CCAM2

TACTTTTCTTAAGTATCATCAATTCCAAATCTTGAAAATCTGTCCTATACATTTGCTACACAATGAAATA  
TCTCCCTATCCTCATCTCTGCTTTTGTAGCAGCCGTTGCTGCAGCCCCGCAAGATCCGTCTGCTGTGGCA  
CCTGTACTCCCTAGACAGACTTGCGTACGTCTTGACTCACAAAAGCGCGATTAGAAAAGAGATGAAAAGG  
TTGTAGCTAATAATTAGTAAAGGTAAGCTGTGTCAATTTGCGCAATGGGTTTTGTGGCGATAACTGTGGT  
AATTCTTGGGCTGTAAGTGCTTTGTCTGTTTCTCAAATCTAAAGCTAATTTGCATGCAGTGTTGCGGATG  
TTAACTTTGGTAGCATTCCAAAGAATTGCGGCCACAAAGATAGTGTAGCTTGAATATTTGAGCTAGCTGC  
CGCTACAAGTCTATAGGATGGCAACCTTAGCTACCTATACGCAAGTCTCTTGCTCCTAGGTTGTTTAGAC  
CGATTTAAATGTTATGTGTATATAATTAGCGCTACATATACACCACACTCCTTTACATACACAAATTTAT  
ACTCTTACGGATCC

>CGHA1

TACTTTTCTTAAGTATCATCAATTCCAAATCTTGAAAATCTGTCCTATACATTTGCTACACAATGAAATA  
TCTCCCTATCCTCATCTCTGCTTTTGTAGCAGCCGTTGCTGCAGCCCCGCAAGATCCGTCTGCTGTGGCA  
CCTGTACTCCCTAGACAGACTTGCGTACGTCTTGACTCACAAAAGCGCGATTAGAAAAGAGATGAAAAGG  
TTGTAGCTAATAATTAGTAAAGGTAAGCTGTGTCAATTTGCGCAATGGGTTTTGTGGCGATAACTGTGGT  
AATTCTTGGGCTGTAAGTGCTTTGTCTGTTTCTCAAATCTAAAGCTAATTTGCATGCAGTGTTGCGGATG  
TTAACTTTGGTAGCATTCCAAAGAATTGCGGCCACAAAGATAGTGTAGCTTGAATATTTGAGCTAGCTGC  
CGCTACAAGTCTATAGGATGGCAACCTTAGCTACCTATACGCAAGTCTCTTGCTCCTAGGTTGTTTAGAC  
CGATTTAAATGTTATGTGTATATAATTAGCGCTACATATACACCACACTCCTTTACATACACAAATTTAT  
ACTCTTACGGATCC

> E70

AAATCTTCTAAACATTGTCGATTCCAGATCTTTCAAACCTGTCCCATAACATTTGCTACATAATGAAATAC  
CTCCCTATCCTCATCTCGGCTTTCGTAGCAGCCATTACTGCGGCTCCACAAGATCCGTCTGCTGTGGCAC  
CTTTGCTCCCTAGACAGTCTTGCGTACGTCTTGACTCATCGAATGACAGCCAGGAAATGAAACAACATGT  
AGCTAATAGTAGATAAAGGTATCGTGTGTCAATTTGGCAATGGGTTCTGTGGCGATAACTGTGGCAATT  
CCTGGGCTGTAAGTATTTAACATCTGTTTCTCAAATCTAAAGCTAATTTGCATACAGTGTTGCGGCTGTT  
AGCTTAAGTAGCATTCTGGAGAATTGTGGTCCACAAGACAGTCTAGCTTGAATACTATAGCTAGCTGTTG  
CTACAAGTCTACAGGGTGGCAGCACTGATTGCCTATATAGGCAATTTGTTGCTACCAAGTATTCTGGACT  
GTTTCTCTCGTTACTTGTATATACTTGGCGCTATATATACACCACACTTATTTACATACCGCAAATCCAA  
ATCCTTGCAGATCC

> E78

AAATCTTCTAAACATTGTCGATTCCAGATCTTTCAAACCTGTCCCATAACATTTGCTACATAATGAAATAC  
CTCCCTATCCTCATCTCGGCTTTCGTAGCAGCCATTACTGCGGCTCCACAAGATCCGTCTGCTGTGGCAC  
CTTTGCTCCCTAGACAGTCTTGCGTACGTCTTGACTCATCGAATGACAGCCAGGAAATGAAACAACATGT  
AGCTAATAGTAGATAAAGGTATCGTGTGTCAATTTGGCAATGGGTTCTGTGGCGATAACTGTGGCAATT  
CCTGGGCTGTAAGTATTTAACATCTGTTTCTCAAAGCTAAAGCTAATTTGCATACAGTGTTGCGGCTGTT  
AGCTTAAGTAGCATTCTGGAGAATTGTGGTCCACAAGACAGTCTAGCTTGAATAGTATAGCTAGCTGTTG  
CTACAAGTCTACAGGGTGGCAGTACTGATTGCCTATATAGGCAATTTGTTGCTACCAAGTATTCTGGACT  
GTTTCTCTCGTTACTTGTATATACTTGGCGCTATATATACACCACACTTATTTACATACCGCAAATCCAA  
ATCCTTGCAGATCC

>E79

AAATCTTCTAAACATTGTCGATTCCAGATCTTTCAAACCTGTCCCATAACATTTGCTACATAATGAAATAC  
CTCCCTATCCTCATCTCGGCTTTCGTAGCAGCCGTTACTGCGGCTCCACAAGATCCGTCTGCTGTGGCAC  
CTTTGCTCCCTAGACAGTCTTGCGTACGTCTTGACTCATCGAATGACAGCCAGGAAATGAAACAACATGT

AGCTAATAGTAGATAAAGGTATCGTGTGTCAATTTTGGCAATGGGTTCTGTGGCGATAACTGTGGCAATT  
CCTGGGCTGTAAGTATTTAACATCTGTTTCTCAAATCTAAAGCTAATTTGCATACAGTGTTCTGGGCTGTT  
AGCTTAAGTAGTATTCTGGAGAATTGTGGTCCACAAGACAGTCTAGCTTGAATACTATAGCTAGCTGTTG  
CTACAAGTCTACAGGGTGGCAGTACTGATTGCCTATATAGGCAAATTTGTTGCTACCAAGTATTCTGGAC  
TGTTTCTCTCGTACTTGTATATACTTGGCGCTATATACACCACACTCATTTACATACCGCAAATCCA  
AATCCTTGCAGATCC

>E139

AAATCTTCTAAACATTGTGCGATTCCAGATCTTTCAAACCTGTCCCATACATTTGCTACATAATGAAATAC  
CTCCCTATCCTCATCTCGGCTTTCGTAGCAGCCGTTACTGCGGCTCCACAAGATCCGCTGCTGTGGCAC  
CTTTGCTCCCTAGACAGTCTTGCCTACGTCTTGACTCATCGAATGACAGCCAGGAAATGAAACAACATGT  
AGCTAATAGTAGATAAAGGTATCGTGTGTCAATTTTGGCAATGGGTTCTGTGGCGATAACTGTGGCAATT  
CCTGGGCTGTAAGTATTTAACATCTGTTTCTCAAATCTAAAGCTAATTTGCATACAGTGTTCTGGGCTGTT  
AGCTTAAGTAGTATTCTGGAGAATTGTGGTCCACAAGACAGTCTAGCTTGAATACTATAGCTAGCTGTTG  
CTACAAGTCTACAGGGTGGCAGTACTGATTGCCTATATAGGCAAATTTGTTGCTACCAAGTATTCTGGAC  
TGTTTCTCTCGTACTTGTATATACTTGGCGCTATATACACCACACTCATTTACATACCGCAAATCCA  
AATCCTTGCAGATCC

>AT113\*(Cas6)

TGCGCTTCTTAAGTACCATCAATTCCAATCTTTCAAACCTGTCCTATACATTTGCTACACAATGAAATA  
TTTCCCTATCCTCATCTCTGCTTTGTAGCAGCCGTTGCTGCAGCCCCGAGGGTCCGCTGCTGTGGCA  
GCAGCTGTCTTCTAGACAGACTTGCCTACGTCTGGAATTATTAAGCACAATTAGAAAAAAGAAACA  
ATATGTAGCTAATACTTAAATAAAGGCTTTTTGTGAATACTTTGGCAATGGATATTGCGGAAACACTTGT  
ACTGGTGATTCTTGGGCTGTAAGTATTTAATTTCTGTTTCTTGAATCTAAAGCTGATTTGCATACAGTGT  
TCGAATTGTTAACTTAGTTAGCGTTCTAGAGAATTGCGGCCCAAGATGGTCTAGCTTGAATGTTTGAG  
CTAGCTGTTGCTGCCAGTCTATAGGATGGCAACCTTAGCTACCTATACGCAAGTCTCTTGCTCCTGAGTC  
ATCTAGATCGATTACATGTTATGTGTATATACTTAGCGCTACATATACACCACACTCCTTTACATACAC  
AAATTCATATTCTTACGGATCC

>RUD

TGCGCTTCTTAAGTACCATCAATTCCAATCTTTCAAACCTGTCCTATACATTTGCTACACAATGAAATA  
TTTCCCTATCCTCATCTCTGCTTTGTAGCAGCCGTTGCTGCAGCCCCGAGGGTCCGCTGCTGTGGCA  
GCAGCTGTCTTCTAGACAGACTTGCCTACGTCTGGAATTATTAAGCACAATTAGAAAAAAGAAACA  
ATATGTAGCTAATACTTAAATAAAGGCTTTTTGTGAATACTTTGGCAATGGATATTGCGGAAACACTTGT  
ACTGGTGATTCTTGGGCTGTAAGTATTTAATTTCTGTTTCTTGAATCTAAAGCTGATTTGCATACAGTGT  
TCGAATTGTTAACTTAGTTAGCGTTCTAGAGAATTGCGGCCCAAGATGGTCTAGCTTGAATGTTTGAG  
CTAGCTGTTGCTGCCAGTCTATAGGATGGCAACCTTAGCTACCTATACGCAAGTCTCTTGCTCCTGAGTC  
ATCTAGATCGATTACATGTTATGTGTATATACTTAGCGCTACATATACACCACACTCCTTTACATACAC  
AAATTCATATTCTTACGGATCC

>SS1

AAATCTTCTAAACATTGTGCGATTCCAGATCTTTTAAACCTGTCCCATACATTTGCTATATAATGAAATAC  
CTCCCTATCCTCATCTCGGCTTTCGTAGCAGCCGTTGCTGCAGCTCCACAAGATCCGCTGCTGTGGCAC  
CTTTACTCCCTAGACAGTCTTGCCTACGTCTTGACTCATCGAATGACAGCCAGGAGATGAAACAACATGT  
AGCTAATAATAGATAAAGGTATCATGTGTCAATTTCCGGCAATGGGTTCTGTGGCGACAACACTGTGGCAATT  
CCTGGGCTGTAAGTATTTAATATCTGTTTCTCAAATCTAAAGCTAATGTGCATACAGTGTTCTGGGCTGTT  
AACTTAAGTAGCATTCTAGAGAATTATGGTCCACAAGACAGTCTAGCTTGAACACTATAGCTAGCTGTTG  
CCACAAGTCTACAGGGTGGCAGTACTGATTGCCTATATAGGCAAACCTGTTGCTACCAAGTATTCTGGAC

TGTTTTCTTGTTACTTATATACAATTGGCGCTATATATACACCACACTCATTTACATACCGCAAATCCA  
AATCCTTGCAGATCC

>HHN10

AAATCTTCTAAACATTGTCGATTCCAGATCTTTTAAACCTGTCCCATACATTTGCTATATAATGAAATAC  
CTCCCTATCCTCATCTCGGCTTTCGTAGCAGCCGTTGCTGCAGCTCCACAAGATCCGCTGCTGTGGCAC  
CTTTACTCCCTAGACAGTCTTGCGTACGTCTTGACTCATCGAATGACAGCCAGGAGATGAAACAACATGT  
AGCTAATAATAGATAAAGGTATCATGTGTCAATTTGGCAATGGGTTCTGTGGCGACAAGTGTGGCAATT  
CCTGGGCTGTAAGTATTTAATATCTGTTTCTCAAATCTAAAGCTAATGTGCATACAGTGTTCGGGCTGTT  
AACTTAAGTAGCATTCTAGAGAATTATGGTCCACAAGACAGTCTAGCTTGAACACTATAGCTAGCTGTTG  
CCACAAGTCTACAGGGTTGCAGTACTGATTGCCTATATAGGCAAACCTGTTGCTACCAAGTATTCTGGAC  
TGTTTTCTTGTTACTTATATACAATTGGCGCTATATATACACCACACTCATTTACATACCGCAAATCCA  
AATCCTTGCAGATCC

>CSB6

AAATCTTCTAAACATTGTCGATTCCAGATCTTTTAAACCTGTCCCATACATTTGCTATATAATGAAATAC  
CTCCCTATCCTCATCTCGGCTTTCGTAGCAGCCGTTGCTGCAGCTCCACAAGATCCGCTGCTGTGGCAC  
CTTTACTCCCTAGACAGTCTTGCGTACGTCTTGACTCATCGAATGACAGCCAGGAGATGAAACAACATGT  
AGCTAATAATAGATAAAGGTATCATGTGTCAATTTGGCAATGGGTTCTGTGGCGACAAGTGTGGCAATT  
CCTGGGCTGTAAGTATTTAATATCTGTTTCTCAAATCTAAAGCTAATGTGCATACAGTGTTCGGGCTGTT  
AACTTAAGTAGCATTCTAGAGAATTATGGTCCACAAGACAGTCTAGCTTGAACACTATAGCTAGCTGTTG  
CCACAAGTCTACAGGGTTGCAGTACTGATTGCCTATATAGGCAAACCTGTTGCTACCAAGTATTCTGGAC  
TGTTTTCTTGTTACTTATATACAATTGGCGCTATATATACACCACACTCATTTACATACCGCAAATCCA  
AATCCTTGCAGATCC

>CSB5

AAATCTTCTAAACATTGTCGATTCCAGATCTTTTAAACCTGTCCCATACATTTGCTATATAATGAAATAC  
CTCCCTATCCTCATCTCGGCTTTCGTAGCAGCCGTTGCTGCAGCTCCACAAGATCCGCTGCTGTGGCAC  
CTTTACTCCCTAGACAGTCTTGCGTACGTCTTGACTCATCGAATGACAGCCAGGAGATGAAACAACATGT  
AGCTAATAATAGATAAAGGTATCATGTGTCAATTTGGCAATGGGTTCTGTGGCGACAAGTGTGGCAATT  
CCTGGGCTGTAAGTATTTAATATCTGTTTCTCAAATCTAAAGCTAATGTGCATACAGTGTTCGGGCTGTT  
AACTTAAGTAGCATTCTAGAGAATTATGGTCCACAAGACAGTCTAGCTTGAACACTATAGCTAGCTGTTG  
CCACAAGTCTACAGGGTTGCAGTACTGATTGCCTATATAGGCAAACCTGTTGCTACCAAGTATTCTGGAC  
TGTTTTCTTGTTACTTATATACAATTGGCGCTATATATACACCACACTCATTTACATACCGCAAATCCA  
AATCCTTGCAGATCC

>CSB3

AAATCTTCTAAACATTGTCGATTCCAGATCTTTTAAACCTGTCCCATACATTTGCTATATAATGAAATAC  
CTCCCTATCCTCATCTCGGCTTTCGTAGCAGCCGTTGCTGCAGCTCCACAAGATCCGCTGCTGTGGCAC  
CTTTACTCCCTAGACAGTCTTGCGTACGTCTTGACTCATCGAATGACAGCCAGGAGATGAAACAACATGT  
AGCTAATAATAGATAAAGGTATCATGTGTCAATTTGGCAATGGGTTCTGTGGCGACAAGTGTGGCAATT  
CCTGGGCTGTAAGTATTTAATATCTGTTTCTCAAATCTAAAGCTAATGTGCATACAGTGTTCGGGCTGTT  
AACTTAAGTAGCATTCTAGAGAATTATGGTCCACAAGACAGTCTAGCTTGAACACTATAGCTAGCTGTTG  
CCACAAGTCTACAGGGTTGCAGTACTGATTGCCTATATAGGCAAACCTGTTGCTACCAAGTATTCTGGAC  
TGTTTTCTTGTTACTTATATACAATTGGCGCTATATATACACCACACTCATTTACATACCGCAAATCCA  
AATCCTTGCAGATCC

>CSB16

AAATCTTCTAAACATTGTCGATTCCAGATCTTTTAAACCTGTCCCATACATTTGCTATATAATGAAATAC

CTCCCTATCCTCATCTCGGCTTTCGTAGCAGCCGTTGCTGCAGCTCCACAAGATCCGCTGCTGTGGCAC  
CTTTACTCCCTAGACAGTCTTGCGTACGTCTTGACTCATCGAATGACAGCCAGGAGATGAAACAACATGT  
AGCTAATAATAGATAAAGGTATCATGTGTCAATTCGGCAATGGGTTCTGTGGCGACAACGTGGCAATT  
CCTGGGCTGTAAGTATTTAATATCTGTTTCTCAAATCTAAAGCTAATGTGCATACAGTGTTCGGGCTGTT  
AACTTAAGTAGCATTCTAGAGAATTATGGTCCACAAGACAGTCTAGCTTGAACACTATAGCTAGCTGTTG  
CCACAAGTCTACAGGGTTGCAGTACTGATTGCCTATATAGGCAAACCTGTTGCTACCAAGTATTCTGGAC  
TGTTTTCTTGTTACTTATATACAATTGGCGCTATATATACACCACACTCATTTACATACCGCAAATCCA  
AATCCTTGCAGATCC

>CSB11

AAATCTTCTAAACATTGTCGATTCCAGATCTTTTAAACCTGTCCCATACATTTGCTATATAATGAAATAC  
CTCCCTATCCTCATCTCGGCTTTCGTAGCAGCCGTTGCTGCAGCTCCACAAGATCCGCTGCTGTGGCAC  
CTTTACTCCCTAGACAGTCTTGCGTACGTCTTGACTCATCGAATGACAGCCAGGAGATGAAACAACATGT  
AGCTAATAATAGATAAAGGTATCATGTGTCAATTCGGCAATGGGTTCTGTGGCGACAACGTGGCAATT  
CCTGGGCTGTAAGTATTTAATATCTGTTTCTCAAATCTAAAGCTAATGTGCATACAGTGTTCGGGCTGTT  
AACTTAAGTAGCATTCTAGAGAATTATGGTCCACAAGACAGTCTAGCTTGAACACTATAGCTAGCTGTTG  
CCACAAGTCTACAGGGTTGCAGTACTGATTGCCTATATAGGCAAACCTGTTGCTACCAAGTATTCTGGAC  
TGTTTTCTTGTTACTTATATACAATTGGCGCTATATATACACCACACTCATTTACATACCGCAAATCCA  
AATCCTTGCAGATCC

>CSB05B

AAATCTTCTAAACATTGTCGATTCCAGATCTTTTAAACCTGTCCCATACATTTGCTATATAATGAAATAC  
CTCCCTATCCTCATCTCGGCTTTCGTAGCAGCCGTTGCTGCAGCTCCACAAGATCCGCTGCTGTGGCAC  
CTTTACTCCCTAGACAGTCTTGCGTACGTCTTGACTCATCGAATGACAGCCAGGAGATGAAACAACATGT  
AGCTAATAATAGATAAAGGTATCATGTGTCAATTCGGCAATGGGTTCTGTGGCGACAACGTGGCAATT  
CCTGGGCTGTAAGTATTTAATATCTGTTTCTCAAATCTAAAGCTAATGTGCATACAGTGTTCGGGCTGTT  
AACTTAAGTAGCATTCTAGAGAATTATGGTCCACAAGACAGTCTAGCTTGAACACTATAGCTAGCTGTTG  
CCACAAGTCTACAGGGTTGCAGTACTGATTGCCTATATAGGCAAACCTGTTGCTACCAAGTATTCTGGAC  
TGTTTTCTTGTTACTTATATACAATTGGCGCTATATATACACCACACTCATTTACATACCGCAAATCCA  
AATCCTTGCAGATCC

>CSB05A

AAATCTTCTAAACATTGTCGATTCCAGATCTTTTAAACCTGTCCCATACATTTGCTATATAATGAAATAC  
CTCCCTATCCTCATCTCGGCTTTCGTAGCAGCCGTTGCTGCAGCTCCACAAGATCCGCTGCTGTGGCAC  
CTTTACTCCCTAGACAGTCTTGCGTACGTCTTGACTCATCGAATGACAGCCAGGAGATGAAACAACATGT  
AGCTAATAATAGATAAAGGTATCATGTGTCAATTCGGCAATGGGTTCTGTGGCGACAACGTGGCAATT  
CCTGGGCTGTAAGTATTTAATATCTGTTTCTCAAATCTAAAGCTAATGTGCATACAGTGTTCGGGCTGTT  
AACTTAAGTAGCATTCTAGAGAATTATGGTCCACAAGACAGTCTAGCTTGAACACTATAGCTAGCTGTTG  
CCACAAGTCTACAGGGTTGCAGTACTGATTGCCTATATAGGCAAACCTGTTGCTACCAAGTATTCTGGAC  
TGTTTTCTTGTTACTTATATACAATTGGCGCTATATATACACCACACTCATTTACATACCGCAAATCCA  
AATCCTTGCAGATCC

>CKT1

AAATCTTCTAAACATTGTCGATTCCAGATCTTTTAAACCTGTCCCATACATTTGCTATATAATGAAATAC  
CTCCCTATCCTCATCTCGGCTTTCGTAGCAGCCGTTGCTGCAGCTCCACAAGATCCGCTGCTGTGGCAC  
CTTTACTCCCTAGACAGTCTTGCGTACGTCTTGACTCATCGAATGACAGCCAGGAGATGAAACAACATGT  
AGCTAATAATAGATAAAGGTATCATGTGTCAATTCGGCAATGGGTTCTGTGGCGACAACGTGGCAATT  
CCTGGGCTGTAAGTATTTAATATCTGTTTCTCAAATCTAAAGCTAATGTGCATACAGTGTTCGGGCTGTT

AACTTAAGTAGCATTCTAGAGAATTATGGTCCACAAGACAGTCTAGCTTGAACACTATAGCTAGCTGTTG  
CCACAAGTCTACAGGGTTGCAGTACTGATTGCCTATATAGGCAAACCTGTTGCTACCAAGTATTCTGGAC  
TGTTTTCTTGTTACTTATATACAATTGGCGCTATATATACACCACACTCATTTACATACCGCAAATCCA  
AATCCTTGCAGATCC

>CKT05F

AAATCTTCTAAACATTGTCGATTCCAGATCTTTTAAACCTGTCCCATACATTTGCTATATAATGAAATAC  
CTCCCTATCCTCATCTCGGCTTTCGTAGCAGCCGTTGCTGCAGCTCCACAAGATCCGTCTGCTGTGGCAC  
CTTTACTCCCTAGACAGTCTTGCGTACGTCTTGACTCATCGAATGACAGCCAGGAGATGAAACAACATGT  
AGCTAATAATAGATAAAGGTATCATGTGTCAATTTCCGGCAATGGGTTCTGTGGCGACAACCTGTGGCAATT  
CCTGGGCTGTAAGTATTTAATATCTGTTTCTCAAATCTAAAGCTAATGTGCATACAGTGTTCGGGCTGTT  
AACTTAAGTAGCATTCTAGAGAATTATGGTCCACAAGACAGTCTAGCTTGAACACTATAGCTAGCTGTTG  
CCACAAGTCTACAGGGTTGCAGTACTGATTGCCTATATAGGCAAACCTGTTGCTACCAAGTATTCTGGAC  
TGTTTTCTTGTTACTTATATACAATTGGCGCTATATATACACCACACTCATTTACATACCGCAAATCCA  
AATCCTTGCAGATCC

>CKT05C

AAATCTTCTAAACATTGTCGATTCCAGATCTTTTAAACCTGTCCCATACATTTGCTATATAATGAAATAC  
CTCCCTATCCTCATCTCGGCTTTCGTAGCAGCCGTTGCTGCAGCTCCACAAGATCCGTCTGCTGTGGCAC  
CTTTACTCCCTAGACAGTCTTGCGTACGTCTTGACTCATCGAATGACAGCCAGGAGATGAAACAACATGT  
AGCTAATAATAGATAAAGGTATCATGTGTCAATTTCCGGCAATGGGTTCTGTGGCGACAACCTGTGGCAATT  
CCTGGGCTGTAAGTATTTAATATCTGTTTCTCAAATCTAAAGCTAATGTGCATACAGTGTTCGGGCTGTT  
AACTTAAGTAGCATTCTAGAGAATTATGGTCCACAAGACAGTCTAGCTTGAACACTATAGCTAGCTGTTG  
CCACAAGTCTACAGGGTTGCAGTACTGATTGCCTATATAGGCAAACCTGTTGCTACCAAGTATTCTGGAC  
TGTTTTCTTGTTACTTATATACAATTGGCGCTATATATACACCACACTCATTTACATACCGCAAATCCA  
AATCCTTGCAGATCC

>C68-8

AAATCTTCTAAACATTGTCGATTCCAGATCTTTTAAACCTGTCCCATACATTTGCTATATAATGAAATAC  
CTCCCTATCCTCATCTCGGCTTTCGTAGCAGCCGTTGCTGCAGCTCCACAAGATCCGTCTGCTGTGGCAC  
CTTTACTCCCTAGACAGTCTTGCGTACGTCTTGACTCATCGAATGACAGCCAGGAGATGAAACAACATGT  
AGCTAATAATAGATAAAGGTATCATGTGTCAATTTCCGGCAATGGGTTCTGTGGCGACAACCTGTGGCAATT  
CCTGGGCTGTAAGTATTTAATATCTGTTTCTCAAATCTAAAGCTAATGTGCATACAGTGTTCGGGCTGTT  
AACTTAAGTAGCATTCTAGAGAATTATGGTCCACAAGACAGTCTAGCTTGAACACTATAGCTAGCTGTTG  
CCACAAGTCTACAGGGTTGCAGTACTGATTGCCTATATAGGCAAACCTGTTGCTACCAAGTATTCTGGAC  
TGTTTTCTTGTTACTTATATACAATTGGCGCTATATATACACCACACTCATTTACATACCGCAAATCCA  
AATCCTTGCAGATCC

>C68-6

AAATCTTCTAAACATTGTCGATTCCAGATCTTTTAAACCTGTCCCATACATTTGCTATATAATGAAATAC  
CTCCCTATCCTCATCTCGGCTTTCGTAGCAGCCGTTGCTGCAGCTCCACAAGATCCGTCTGCTGTGGCAC  
CTTTACTCCCTAGACAGTCTTGCGTACGTCTTGACTCATCGAATGACAGCCAGGAGATGAAACAACATGT  
AGCTAATAATAGATAAAGGTATCATGTGTCAATTTCCGGCAATGGGTTCTGTGGCGACAACCTGTGGCAATT  
CCTGGGCTGTAAGTATTTAATATCTGTTTCTCAAATCTAAAGCTAATGTGCATACAGTGTTCGGGCTGTT  
AACTTAAGTAGCATTCTAGAGAATTATGGTCCACAAGACAGTCTAGCTTGAACACTATAGCTAGCTGTTG  
CCACAAGTCTACAGGGTTGCAGTACTGATTGCCTATATAGGCAAACCTGTTGCTACCAAGTATTCTGGAC  
TGTTTTCTTGTTACTTATATACAATTGGCGCTATATATACACCACACTCATTTACATACCGCAAATCCA  
AATCCTTGCAGATCC

>CSR12

AAATCTTCTAAACATTGTCGATTCCAGATCTTTTAAACCTGTCCCATACATTTGCTATATAATGAAATAC  
CTCCCTATCCTCATCTCGGCTTTCTAGCAGCCGTTGCTGCAGCTCCACAAGATCCGCTGCTGTGGCAC  
CTTTACTCCCTAGACAGTCTTGCGTACGTCTTGACTCATCGAATGACAGCCAGGAGATGAAACAACATGT  
AGCTAATAATAGATAAAGGTATCATGTGTCAATTTCCGGCAATGGGTTCTGTGGCGACAACCTGTGGCAATT  
CCTGGGCTGTAAGTATTTAATATCTGTTTCTCAAATCTAAAGCTAATGTGCATACAGTGTTCGGGCTGTT  
AACTTAAGTAGCATTCTAGAGAATTATGGTCCACAAGACAGTCTAGCTTGAACACTATAGCTAGCTGTTG  
CCACAAGTCTACAGGGTTGCAGTACTGATTGCCTATATAGGCAAACCTGTTGCTACCAAGTATTCTGGAC  
TGTTTTCTTGTACTTATATACAATTGGCGCTATATATACACCACACTCATTTACATACCGCAAATCCA  
AATCCTTGCAGATCC

>CSB16R1

AAATCTTCTAAACATTGTCGATTCCAGATCTTTTAAACCTGTCCCATACATTTGCTATATAATGAAATAC  
CTCCCTATCCTCATCTCGGCTTTCTAGCAGCCGTTGCTGCAGCTCCACAAGATCCGCTGCTGTGGCAC  
CTTTACTCCCTAGACAGTCTTGCGTACGTCTTGACTCATCGAATGACAGCCAGGAGATGAAACAACATGT  
AGCTAATAATAGATAAAGGTATCATGTGTCAATTTCCGGCAATGGGTTCTGTGGCGACAACCTGTGGCAATT  
CCTGGGCTGTAAGTATTTAATATCTGTTTCTCAAATCTAAAGCTAATGTGCATACAGTGTTCGGGCTGTT  
AACTTAAGTAGCATTCTAGAGAATTATGGTCCACAAGACAGTCTAGCTTGAACACTATAGCTAGCTGTTG  
CCACAAGTCTACAGGGTTGCAGTACTGATTGCCTATATAGGCAAACCTGTTGCTACCAAGTATTCTGGAC  
TGTTTTCTTGTACTTATATACAATTGGCGCTATATATACACCACACTCATTTACATACCGCAAATCCA  
AATCCTTGCAGATCC

>CSB4

AAATCTTCTAAACATTGTCGATTCCAGATCTTTTAAACCTGTCCCATACATTTGCTATATAATGAAATAC  
CTCCCTATCCTCATCTCGGCTTTCTAGCAGCCGTTGCTGCAGCTCCACAAGATCCGCTGCTGTGGCAC  
CTTTACTCCCTAGACAGTCTTGCGTACGTCTTGACTCATCGAATGACAGCCAGGAGATGAAACAACATGT  
AGCTAATAATAGATAAAGGTATCATGTGTCAATTTCCGGCAATGGGTTCTGTGGCGACAACCTGTGGCAATT  
CCTGGGCTGTAAGTATTTAATATCTGTTTCTCAAATCTAAAGCTAATGTGCATACAGTGTTCGGGCTGTT  
AACTTAAGTAGCATTCTAGAGAATTATGGTCCACAAGACAGTCTAGCTTGAACACTATAGCTAGCTGTTG  
CCACAAGTCTACAGGGTTGCAGTACTGATTGCCTATATAGGCAAACCTGTTGCTACCAAGTATTCTGGAC  
TGTTTTCTTGTACTTATATACAATTGGCGCTATATATACACCACACTCATTTACATACCGCAAATCCA  
AATCCTTGCAGATCC

>CSB1

AAATCTTCTAAACATTGTCGATTCCAGATCTTTTAAACCTGTCCCATACATTTGCTATATAATGAAATAC  
CTCCCTATCCTCATCTCGGCTTTCTAGCAGCCGTTGCTGCAGCTCCACAAGATCCGCTGCTGTGGCAC  
CTTTACTCCCTAGACAGTCTTGCGTACGTCTTGACTCATCGAATGACAGCCAGGAGATGAAACAACATGT  
AGCTAATAATAGATAAAGGTATCATGTGTCAATTTCCGGCAATGGGTTCTGTGGCGACAACCTGTGGCAATT  
CCTGGGCTGTAAGTATTTAATATCTGTTTCTCAAATCTAAAGCTAATGTGCATACAGTGTTCGGGCTGTT  
AACTTAAGTAGCATTCTAGAGAATTATGGTCCACAAGACAGTCTAGCTTGAACACTATAGCTAGCTGTTG  
CCACAAGTCTACAGGGTTGCAGTACTGATTGCCTATATAGGCAAACCTGTTGCTACCAAGTATTCTGGAC  
TGTTTTCTTGTACTTATATACAATTGGCGCTATATATACACCACACTCATTTACATACCGCAAATCCA  
AATCCTTGCAGATCC

>LP138

TATCGTTTCGATCTTTGAGACCTGTCCTATATATTTGCTACACAATGAAATACCTCCCTATCTTCATCTCT  
GCTTTTGTAGCAGCCGTTGCTGCAGTTCCGCAGGGTCCGCTGCTGCGGCAGCAGCTATTCTTCTAGAC  
AGTCTTGCCTACGTCTTGACTTATCAAAGCACGATCAGAAAAAATGAAACAATTTGTAACATAAATTGG

TAAAGGTATCATGTGTCGATTCGGCAACGGGTTCTGTGGCGACAACCTGTGGTAATCCTGGGCTGTAAG  
TATTTAATATCTGTTTCTTGATTCTAAAGCTAATTTGCATACAGTGTTGGGTTGTTAGCTTAGGTAGCG  
TTCTAGATAATTGTGGCCTACAAGATAGTGTAGCTTGAATATTTGAGCTGGCTGCCGCTACAAGTCTAAA  
GGATGGCAACCTTAGCTACCTATACGCAAGTATCTTACTTCTAGGTCGTTTAGACCAATTTGCATATTAT  
GTGTATATACTTAGCGCTACATATACACCACACTCCTTTACAAACACAAATTTATATTCTTACGGACCCT  
AAAATTTGCTCTACAAAACGTGAGATAGCGTGAAAAGGCGGTTTGGCCTATAGTTCTCTTTAACTAGTT  
CTGTATCTTGCTTTCTGTATCCCAAGCATATTTACGCAAAGTTTAAAGAGCCACCCGGTTCTGAAATCC  
GTTTGTGGAT

>CC01

TACGTTTCTTAAGCACTATCAGTTCGAAATCTTTGAGACCTGTCCTATATATTTGCTACACAATGAAATA  
CCTCCCTATCTTCATCTCTGCTTTGTAGCAGCCGTTGCTGCAGTTCGCGAGGGTCCGTCTGCTGCGGCA  
GCAGCTATTCTTCCTAGACAGTCTTGCGTACGCTTGACTTATCAAAGCACGATCAGAAAAAATGAAACA  
ATTTGTAACATAAATTGGTAAAGGTATCACGTGTCGATTCGGCAACGGGTTCTGTGGCGACAACCTGTG  
GTAATTCCTGGGCTGTAAGTATTTAATATCTGTTTCTTGATTCTAAAGCTAATTTGCATACAGTGTTGCG  
GTTGTTAGCTTAGGTAGCGTTCTAGATAATTGTGGCCTACAAGATAGTGTAGCTTGAATATTTGAGCTGG  
CTGCCGCTACAAGTCTAAAGGATGGCAACCTTAGCTACCTATACGCAAGTATCTTACTTCTAGGTCGCTT  
AGACCAATTTGCATATTATGTGTATATACTTAGCGCTACATATACACCACACTCCTTTACATACACAAAT  
TTATATTCTTACGGATCC

>AT113

TACGTTTCTTAAGCACTATCAGTTCGAAATCTTTGAGACCTGTCCTATATATTTGCTACACAATGAAATA  
CCTCCCTATCTTCATCTCTGCTTTGTAGCAGCCGTTGCTGCAGTTCGCGAGGGTCCGTCTGCTGCGGCA  
GCAGCTATTCTTCCTAGACAGTCTTGCGTACGCTTGACTTATCAAAGCACGATCAGAAAAAATGAAACA  
ATTTGTAACATAAATTGGTAAAGGTATCATGTGTCGATTCGGCAACGGGTTCTGTGGCGACAACCTGTG  
GTAATTCCTGGGCTGTAAGTATTTAATATCTGTTTCTTGATTCTAAAGCTAATTTGCATACAGTGTTGCG  
GTTGTTAGCTTAGGTAGCGTTCTAGATAATTGTGGCCTACAAGATAGTGTAGCTTGAATATTTGAGCTGG  
CTGCCGCTACAAGTCTAAAGGATGGCAACCTTAGCTACCTATACGCAAGTATCTTACTTCTAGGTCGTTT  
AGACCAATTTGCATATTATGTGTATATACTTAGCGCTACATATACACCACACTCCTTTACAAACACAAAT  
TTATATTCTTACGGATCC

>JMP2020

TACGTTTCTTAAGCACTATCAGTTCGAAATCTTTGAGACCTGTCCTATATATTTGCTACACAATGAAATA  
CCTCCCTATCTTCATCTCTGCTTTGTAGCAGCCGTTGCTGCAGTTCGCGAGGGTCCGTCTGCTGCGGCA  
GCAGCTATTCTTCCTAGACAGTCTTGCGTACGCTTGACTTATCAAAGCACGATCAGAAAAAATGAAACA  
ATTTGTAACATAAATTGGTAAAGGTATCATGTGTCGATTCGGCAACGGGTTCTGTGGCGACAACCTGTG  
GTAATTCCTGGGCTGTAAGTATTTAATATCTGTTTCTTGATTCTAAAGCTAATTTGCATACAGTGTTGCG  
GTTGTTAGCTTAGGTAGCGTTCTAGATAATTGTGGCCTACAAGATAGTGTAGCTTGAATATTTGAGCTGG  
CTGCCGCTACAAGTCTAAAGGATGGCAACCTTAGCTACCTATACGCAAGTATCTTACTTCTAGGTCGTTT  
AGACCAATTTGCATATTATGTGTATGTACTTAGCGCTACATATACACCACACTCCTTTACATACACAAAT  
TTATATTCTTACGGATCC

>GS02

TACGTTTCTTAAGCACTATCAGTTCGAAATCTTTGAGACCTGTCCTATATATTTGCTACACAATGAAATA  
CCTCCCTATCTTCATCTCTGCTTTGTAGCAGCCGTTGCTGCAGTTCGCGAGGGTCCGTCTGCTGCGGCA  
GCAGCTATTCTTCCTAGACAGTCTTGCGTACGCTTGACTTGTCAAAGCACGATCAGAAAAAATGAAACA  
AATTGTAACATAAATTGGTAAAGGTATCATGTGTCGATTCGGCAACGGGTTCTGTGGCGACAACCTGTG  
GTAATTCCTGGGCTGTAAGTATTTAATATCTGTTTCTTGATTCTAAAGCTAATTTGCATACAGTGTTGCG



GTTGTTAGCTTAGGTAGCGTTCTAGATAATTGTGGCCTACAAGATAGTGTAGCTTGAATATTTGAGCTGG  
CTGCCGCTACAAGTCTAAAGGATGGCAACCTTAGCTACCTATACGCAAGTATCTTACTTCTAGGTCGTTT  
AGACCAATTTGCATATTATGTGTATGTACTTAGCGCTACATATACACCACACTCCTTTACATACACAAAT  
TTATATTCTTACGGATCC

>PB

TACGTTTCTTAAGCACTATCAGTTCGAAATCTTTGAGACCTGTCCTATATATTTGCTACACAATGAAATA  
CCTCCCTATCTTCATCTCTGCTTTGTAGCAGCCGTTGCTGCAGTTCGCGAGGGTCCGTCTGCTGCGGCA  
GCAGCTATTCTTCCTAGACAGTCTTGCGTACGCTTGACTTATCAAAGCACGATCAGAAAAAATGAAACA  
ATTTGTAACATAAATTGGTAAAGGATCATGTGTCGATTCGGCAACGGGTTCTGTGGCGACAACCTGTG  
GTAATTCCTGGGCTGTAAGTATTTAATATCTGTTTCTTGATTCTAAAGCTAATTTGCATACAGTGTTGCG  
GTTGTTAGCTTAGGTAGCGTTCTAGATAATTGTGGCCTACAAGATAGTGTAGCTTGAATATTTGAGCTGG  
CTGCCGCTACAAGTCTAAAGGATGGCAACCTTAGCTACCTATACGCAAGTATCTTACTTCTAGGTCGTTT  
AGACCAATTTGCATATTATGTGTATATACTTAGCGCTACATATACACCACACTCCTTTACATACACAAAT  
TTATATTCTTACGGATCC

>RUD

TACGTTTCTTAAGCACTATCAGTTCGAAATCTTTGAGACCTGTCCTATATATTTGCTACACAATGAAATA  
CCTCCCTATCTTCATCTCTGCTTTGTAGCAGCCGTTGCTGCAGTTCGCGAGGGTCCGTCTGCTGCGGCA  
GCAGCTATTCTTCCTAGACAGTCTTGCGTACGCTTGACTTATCAAAGCACGATCAGAAAAAATGAAACA  
ATTTGTAACATAAATTGGTAAAGGATCATGTGTCGATTCGGCAACGGGTTCTGTGGCGACAACCTGTG  
GTAATTCCTGGGCTGTAAGTATTTAATATCTGTTTCTTGATTCTAAAGCTAATTTGCATACAGTGTTGCG  
GTTGTTAGCTTAGGTAGCGTTCTAGATAATTGTGGCCTACAAGATAGTGTAGCTTGAATATTTGAGCTGG  
CTGCCGCTACAAGTCTAAAGGATGGCAACCTTAGCTACCTATACGCAAGTATCTTACTTCTAGGTCGTTT  
AGACCAATTTGCATATTATGTGTATATACTTAGCGCTACATATACACCACACTCCTTTACATACACAAAT  
TTATATTCTTACGGATCC

>IA

TACGTTTCTTAAGCACTATCAGTTCGAAATCTTTGAGACCTGTCCTATATATTTGCTACACAATGAAATA  
CCTCCCTATCTTCATCTCTGCTTTGTAGCAGCCGTTGCTGCAGTTCGCGAGGGTCCGTCTGCTGCGGCA  
GCAGCTATTCTTCCTAGACAGTCTTGCGTACGCTTGACTTATCAAAGCACGATCAGAAAAAATGAAACA  
ATTTGTAACATAAATTGGTAAAGGATCATGTGTCGATTCGGCAACGGGTTCTGTGGCGACAACCTGTG  
GTAATTCCTGGGCTGTAAGTATTTAATATCTGTTTCTTGATTCTAAAGCTAATTTGCATACAGTGTTGCG  
GTTGTTAGCTTAGGTAGCGTTCTAGATAATTGTGGCCTACAAGATAGTGTAGCTTGAATATTTGAGCTGG  
CTGCCGCTACAAGTCTAAAGGATGGCAACCTTAGCTACCTATACGCAAGTATCTTACTTCTAGGTCGTTT  
AGACCAATTTGCATATTATGTGTATATACTTAGCGCTACATATACACCACACTCCTTTACATACACAAAT  
TTATATTCTTACGGATCC

>EDIG

TACGTTTCTTAAGCACTATCAGTTCGAAATCTTTGAGACCTGTCCTATATATTTGCTACACAATGAAATA  
CCTCCCTATCTTCATCTCTGCTTTGTAGCAGCCGTTGCTGCAGTTCGCGAGGGTCCGTCTGCTGCGGCA  
GCAGCTATTCTTCCTAGACAGTCTTGCGTACGCTTGACTTATCAAAGCACGATCAGAAAAAATGAAACA  
ATTTGTAACATAAATTGGTAAAGGATCATGTGTCGATTCGGCAACGGGTTCTGTGGCGACAACCTGTG  
GTAATTCCTGGGCTGTAAGTATTTAATATCTGTTTCTTGATTCTAAAGCTAATTTGCATACAGTGTTGCG  
GTTGTTAGCTTAGGTAGCGTTCTAGATAATTGTGGCCTACAAGATAGTGTAGCTTGAATATTTGAGCTGG  
CTGCCGCTACAAGTCTAAAGGATGGCAACCTTAGCTACCTATACGCAAGTATCTTACTTCTAGGTCGTTT  
AGACCAATTTGCATATTATGTGTATATACTTAGCGCTACATATACACCACACTCCTTTACATACACAAAT  
TTATATTCTTACGGATCC

>CMENY

TACGTTTCTTAAGCACTATCAGTTCGAAATCTTTGAGACCTGTCCTATATATTTGCTACACAATGAAATA  
CCTCCCTATCTTCATCTCTGCTTTGTAGCAGCCGTTGCTGCAGTTCGCGAGGGTCCGTCTGCTGCGGCA  
GCAGCTATTCTTCCTAGACAGTCTTGCGTACGTCTTGACTTATCAAAGCACGATCAGAAAAATGAAACA  
ATTTGTAACATAAATTGGTAAAGGTATCATGTGTCGATTCGGCAACGGGTTCTGTGGCGACAACCTGTG  
GTAATTCCTGGGCTGTAAGTATTTAATATCTGTTTCTTGATTCTAAAGCTAATTTGCATACAGTGTTCCGG  
GTTGTTAGCTTAGGTAGCGTTCTAGATAATTGTGGCCTACAAGATAGGTAGCTTGAATATTTGAGCTGG  
CTGCCGCTACAAGTCTAAAGGATGGCAACCTTAGCTACCTATACGCAAGTATCTTACTTCTAGGTCGTTT  
AGACCAATTTGCATATTATGTGTATATACTTAGCGCTACATATACACCACACTCCTTTACATACACAAAT  
TTATATTCTTACGGATCC

>AT117

TACGTTTCTTAAGCACTATCAGTTCGAAATCTTTGAGACCTGTCCTATATATTTGCTACACAATGAAATA  
CCTCCCTATCTTCATCTCTGCTTTGTAGCAGCCGTTGCTGCAGTTCGCGAGGGTCCGTCTGCTGCGGCA  
GCAGCTATTCTTCCTAGACAGTCTTGCGTACGTCTTGACTTATCAAAGCACGATCAGAAAAATGAAACA  
ATTTGTAACATAAATTGGTAAAGGTATCATGTGTCGATTCGGCAACGGGTTCTGTGGCGACAACCTGTG  
GTAATTCCTGGGCTGTAAGTATTTAATATCTGTTTCTTGATTCTAAAGCTAATTTGCATACAGTGTTCCGG  
GTTGTTAGCTTAGGTAGCGTTCTAGATAATTGTGGCCTACAAGATAGGTAGCTTGAATATTTGAGCTGG  
CTGCCGCTACAAGTCTAAAGGATGGCAACCTTAGCTACCTATACGCAAGTATCTTACTTCTAGGTCGTTT  
AGACCAATTTGCATATTATGTGTATATACTTAGCGCTACATATACACCACACTCCTTTACATACACAAAT  
TTATATTCTTACGGATCC

>CBS

TACGTTTCTTAAGCACTATCAGTTCGAAATCTTTGAGACCTGTCCTATATATTTGCTACACAATGAAATA  
CCTCCCTATCTTCATCTCTGCTTTGTAGCAGCCGTTGCTGCAGTTCGCGAGGGTCCGTCTGCTGCGGCA  
GCAGCTATTCTTCCTAGACAGTCTTGCGTACGTCTTGACTTATCAAAGCACGATCAGAAAAATGAAACA  
ATTTGTAACATAAATTGGTAAAGGTATCATGTGTCGATTCGGCAACGGGTTCTGTGGCGACAACCTGTG  
GTAATTCCTGGGCTGTAAGTATTTAATATCTGTTTCTTGATTCTAAAGCTAATTTGCATACAGTGTTCCGG  
GTTGTTAGCTTAGGTAGCGTTCTAGATAATTGTGGCCTACAAGATAGGTAGCTTGAATATTTGAGCTGG  
CTGCCGCTACAAGTCTAAAGGATGGCAACCTTAGCTACCTATACGCAAGTATCTTACTTCTAGGTCGTTT  
AGACCAATTTGCATATTATGTGTATATACTTAGCGCTACATATACACCACACTCCTTTACATACACAAAT  
TTATATTCTTACGGATCC

>AT11

TACGTTTCTTAAGCACTATCAGTTCGAAATCTTTGAGACCTGTCCTATATATTTGCTACACAATGAAATA  
CCTCCCTATCTTCATCTCTGCTTTGTAGCAGCCGTTGCTGCAGTTCGCGAGGGTCCGTCTGCTGCGGCA  
GCAGCTATTCTTCCTAGACAGTCTTGCGTACGTCTTGACTTATCAAAGCACGATCAGAAAAATGAAACA  
ATTTGTAACATAAATTGGTAAAGGTATCATGTGTCGATTCGGCAACGGGTTCTGTGGCGACAACCTGTG  
GTAATTCCTGGGCTGTAAGTATTTAATATCTGTTTCTTGATTCTAAAGCTAATTTGCATACAGTGTTCCGG  
GTTGTTAGCTTAGGTAGCGTTCTAGATAATTGTGGCCTACAAGATAGGTAGCTTGAATATTTGAGCTGG  
CTGCCGCTACAAGTCTAAAGGATGGCAACCTTAGCTACCTATACGCAAGTATCTTACTTCTAGGTCGTTT  
AGACCAATTTGCATATTATGTGTATATACTTAGCGCTACATATACACCACACTCCTTTACATACACAAAT  
TTATATTCTTACGGATCC

>777AA

TACGTTTCTTAAGCACTATCAGTTCGAAATCTTTGAGACCTGTCCTATATATTTGCTACACAATGAAATA  
CCTCCCTATCTTCATCTCTGCTTTGTAGCAGCCGTTGCTGCAGTTCGCGAGGGTCCGTCTGCTGCGGCA  
GCAGCTATTCTTCCTAGACAGTCTTGCGTACGTCTTGACTTATCAAAGCACGATCAGAAAAATGAAACA

ATTTGTAAC TAATAATTGGTAAAGGTATCATGTGTCGATTCGGCAACGGGTTCTGTGGCGACAAC TGTG  
GTAATTCCTGGGCTGTAAGTATTTAATATCTGTTTCTTGATTCTAAAGCTAATTTGCATACAGTGTT CGG  
GTTGTTAGCTTAGGTAGCGTTCTAGATAATTGTGGCCTACAAGATAGTGTAGCTTGAATATTTGAGCTGG  
CTGCCGCTACAAGTCTAAAGGATGGCAACCTTAGCTACCTATACGCAAGTATCTTACTTCTAGGTCGTTT  
AGACCAATTTGCATATTATGTGTATATACTTAGCGCTACATATACACCACACTCCTTTACATACACAAAT  
TTATATTCTTACGGATCC

>493AA

TACGTTTCTTAAGCACTATCAGTTCGAAATCTTTGAGACCTGTCCTATATATTTGCTACACAATGAAATA  
CCTCCCTATCTTCATCTCTGCTTTTGTAGCAGCCGTTGCTGCAGTTC CGCAGGGTCCGCTCTGCTGCGGCA  
GCAGCTATTCTTCCTAGACAGTCTTGCGTACGCTTGACTTATCAAAGCACGATCAGAAAAAATGAAACA  
ATTTGTAAC TAATAATTGGTAAAGGTATCATGTGTCGATTCGGCAACGGGTTCTGTGGCGACAAC TGTG  
GTAATTCCTGGGCTGTAAGTATTTAATATCTGTTTCTTGATTCTAAAGCTAATTTGCATACAGTGTT CGG  
GTTGTTAGCTTAGGTAGCGTTCTAGATAATTGTGGCCTACAAGATAGTGTAGCTTGAATATTTGAGCTGG  
CTGCCGCTACAAGTCTAAAGGATGGCAACCTTAGCTACCTATACGCAAGTATCTTACTTCTAGGTCGTTT  
AGACCAATTTGCATATTATGTGTATATACTTAGCGCTACATATACACCACACTCCTTTACATACACAAAT  
TTATATTCTTACGGATCC

>YN49

TCTTCTAAACATTGTCGATTCCAGATCTTTTAAACCTGTCCCATACATTTGCTATATAAT  
GAAATACCTCCCTATCCTCATCTCGGCTTTCGTAGCAGCCGTTGCTGCAGCTCCACAAGA  
TCCGTCTGCTGTGGCACCTTTACTCCCTAGACAGTCTTGCGTACGTCTTGACTCATCGAA  
TGACAGCCAGGAGATGAAACAACATGTAGCTAATAATAGATAAAGGTATCATGTGTCAAT  
TTCGGCAATGGGTTCTGTGGCGACAAC TGTGGCAATTCCTGGGCTGTAAGTATTTAATAT  
CTGTTTCTCAAATCTAAAGCTAATGTGCATACAGTGTT CGGGCTGTAACTTAAGTAGCA  
TTCTAGAGAATTATGGTCCACAAGACAGTCTAGCTTGAACACTATAGCTAGCTGTTGCCA  
CAAGTCTACAGGGTTGCAGTACTGATTGCCTATATAGGCAAACCTGTTGCTACCAAGTAT  
TCTGGACTGTTTTTCTTGTTACTTATATACAATTGGCGC-TATATA-TACACCACACTCA  
TTTACATACCGCAAATCCAAATCCTTGAGATCCTAAACTTTGCTCTGCATAACGTGAGA  
TCACACAAGCAGGGAAC TTGGCCAGTAGTTC
